# Supplementary material for: Resveratrol and 2-Ethyl-6-Methyl-3-Hydroxypiridine N-Acetyl Cysteinate as Protecting Agents upon the Stress Exposure
Source: MDPI journal article supplement (doi:10.3390/ijms241713172), 2023-08-24
Supplement: s1 [file s1]

## Supplementary Materials

# Resveratrol and 2-Ethyl-6-Methyl-3-Hydroxypiridine N-Acetyl Cysteinate as Protecting Agents upon the Stress Exposure

Irina V. Zhigacheva <sup>1</sup>, Irina F. Rusina <sup>2</sup>, Natalia I. Krikunova <sup>1</sup>, Aleksandr N. Goloschapov <sup>1</sup>, Timur L. Veprintsev <sup>1</sup>, Olga I. Yablonskaya <sup>1</sup> and Aleksei V. Trofimov <sup>1,3,\*</sup>

<sup>1</sup> Emanuel Institute of Biochemical Physics, Russian Academy of Sciences; Ul. Kosygina 4, Moscow 119334, Russia; zhigacheva@mail.ru (I.V.Z.); kric@mail.ru (N.I.K.); golan@sky.chph.ras.ru (A.N.G.); timlev@yandex.ru (T.L.V.); olga.yablonsky@gmail.com (O.I.Y.)

<sup>2</sup> N.N. Semenov Federal Research Center for Chemical Physics, Russian Academy of Sciences; Ul. Kosygina 4, Moscow 119334, Russia; rusina939@mail.ru

<sup>3</sup> Moscow Institute of Physics and Technology (National Research University), Institutskii per. 9, Dolgoprudny 141701, Russia

\* Correspondence: avt\_2003@mail.ru; Tel.: +7-495-939-7358

**Table S1.** Influence of the AHH conditions and RSV on the relative percentage of C<sub>18</sub> FA in the membranes of the mouse-liver mitochondria <sup>1</sup>

| FA              | Control <sup>2</sup> | Control and RSV <sup>3</sup> | AHH <sup>4</sup> | AHH and RSV <sup>5</sup> |
|-----------------|----------------------|------------------------------|------------------|--------------------------|
| 18:2 $\omega$ 6 | 13.50 $\pm$ 0.15     | 14.00 $\pm$ 0.02             | 12.71 $\pm$ 0.10 | 14.35 $\pm$ 0.10         |
| 18:1 $\omega$ 9 | 11.00 $\pm$ 0.50     | 9.00 $\pm$ 0.12              | 9.50 $\pm$ 0.13  | 9.55 $\pm$ 0.95          |
| 18:1 $\omega$ 7 | 2.90 $\pm$ 0.04      | 2.80 $\pm$ 0.03              | 2.13 $\pm$ 0.30  | 2.60 $\pm$ 0.10          |
| 18:0            | 16.75 $\pm$ 1.30     | 16.00 $\pm$ 0.04             | 15.98 $\pm$ 1.00 | 16.85 $\pm$ 1.65         |
| 20:4 $\omega$ 6 | 20.30 $\pm$ 1.00     | 20.10 $\pm$ 0.50             | 20.93 $\pm$ 0.76 | 20.15 $\pm$ 1.35         |
| 20:3 $\omega$ 6 | 1.90 $\pm$ 0.02      | 1.80 $\pm$ 0.03              | 1.56 $\pm$ 0.03  | 2.05 $\pm$ 0.55          |
| 20:5 $\omega$ 3 | 0.50 $\pm$ 0.01      | 0.45 $\pm$ 0.03              | 0.20 $\pm$ 0.04  | 0.55 $\pm$ 0.15          |
| 20:0            | 9.60 $\pm$ 0.02      | 9.22 $\pm$ 0.01              | 13.00 $\pm$ 0.40 | 10.00 $\pm$ 0.05         |
| 22:6 $\omega$ 3 | 9.60 $\pm$ 0.01      | 10.00 $\pm$ 0.50             | 13.01 $\pm$ 2.04 | 10.00 $\pm$ 0.50         |
| 22:4 $\omega$ 6 | 0.55 $\pm$ 0.20      | 0.50 $\pm$ 0.15              | 0.40 $\pm$ 0.10  | 0.50 $\pm$ 0.01          |
| 22:5 $\omega$ 3 | 0.60 $\pm$ 0.01      | 0.56 $\pm$ 0.12              | 0.43 $\pm$ 0.11  | 0.60 $\pm$ 0.01          |

<sup>1</sup> Arbitrary units

<sup>2</sup> The control group (5-day injection of double-distilled water to mice in volumes corresponding to the injected volumes of RSV samples)

<sup>3</sup> The control group upon the RSV administration

<sup>4</sup> The group subjected to the AHH-induced stress

<sup>5</sup> The group subjected to the AHH-induced stress upon the RSV administration

**Table S2.** Influence of the AHH conditions and NAC-3-HP on the relative percentage of C<sub>18</sub> FA in the membranes of the mouse-liver mitochondria <sup>1</sup>

| FA              | Control <sup>2</sup> | Control and NAC-3-HP <sup>3</sup> | AHH <sup>4</sup> | AHH and NAC-3-HP <sup>5</sup> |
|-----------------|----------------------|-----------------------------------|------------------|-------------------------------|
| 18:2 $\omega$ 6 | 13.50 $\pm$ 0.15     | 13.60 $\pm$ 0.03                  | 12.70 $\pm$ 0.10 | 17.20 $\pm$ 0.04              |
| 18:1 $\omega$ 9 | 11.00 $\pm$ 0.50     | 11.90 $\pm$ 0.15                  | 9.0 $\pm$ 0.13   | 11.40 $\pm$ 0.82              |
| 18:1 $\omega$ 7 | 2.90 $\pm$ 0.04      | 2.70 $\pm$ 0.02                   | 2.10 $\pm$ 0.40  | 2.80 $\pm$ 0.30               |
| 18:0            | 16.75 $\pm$ 1.30     | 15.00 $\pm$ 0.05                  | 15.98 $\pm$ 1.00 | 15.00 $\pm$ 0.65              |
| 20:4 $\omega$ 6 | 20.30 $\pm$ 0.01     | 19.25 $\pm$ 0.01                  | 20.93 $\pm$ 0.76 | 20.26 $\pm$ 0.04              |
| 20:3 $\omega$ 6 | 9.60 $\pm$ 0.01      | 9.20 $\pm$ 0.01                   | 7.85 $\pm$ 0.03  | 10.55 $\pm$ 0.02              |
| 20:5 $\omega$ 3 | 0.50 $\pm$ 0.01      | 0.52 $\pm$ 0.03                   | 0.34 $\pm$ 0.02  | 0.58 $\pm$ 0.03               |
| 20:0            | 9.60 $\pm$ 0.02      | 8.05 $\pm$ 0.03                   | 13.00 $\pm$ 0.40 | 9.40 $\pm$ 0.02               |
| 22:6 $\omega$ 3 | 9.80 $\pm$ 0.05      | 9.40 $\pm$ 0.03                   | 10.00 $\pm$ 0.40 | 9.64 $\pm$ 1.80               |
| 22:4 $\omega$ 6 | 0.40 $\pm$ 0.01      | 0.36 $\pm$ 0.01                   | 0.23 $\pm$ 0.18  | 0.45 $\pm$ 0.30               |
| 22:5 $\omega$ 3 | 0.43 $\pm$ 0.11      | 0.40 $\pm$ 0.20                   | 0.35 $\pm$ 0.05  | 0.41 $\pm$ 0.05               |

<sup>1</sup> Arbitrary units

<sup>2</sup> The control group (5-day injection of double-distilled water to mice in volumes corresponding to the injected volumes of NAC-3-HP samples)

<sup>3</sup> The control group upon the NAC-3-HP administration

<sup>4</sup> The group subjected to the AHH-induced stress

<sup>5</sup> The group subjected to the AHH-induced stress upon the NAC-3-HP administration

**Table S3.** Protective activity of RSV upon the stress exposure <sup>1</sup>

| Impact                                                                         | Measured parameters              | Control <sup>2</sup>  | RSV <sup>3</sup>      |
|--------------------------------------------------------------------------------|----------------------------------|-----------------------|-----------------------|
| Modeling of ascent to a height of 11.5 thousand m ( <i>hypobaric hypoxia</i> ) | Lifetime (min)<br>% of survivors | 4.0 $\pm$ 1.1<br>20 % | 7.8 $\pm$ 1.1<br>30 % |
| Injection of sodium azide 20 mg/kg ( <i>cytotoxic hypoxia</i> )                | Lifetime (min)<br>% of survivors | 3.2 $\pm$ 0.8<br>0 %  | 7.4 $\pm$ 1.0<br>15 % |
| Injection of sodium nitrite 250 mg/kg ( <i>hemic hypoxia</i> )                 | Lifetime (min)<br>% of survivors | 15.1 $\pm$ 1.5<br>0 % | 30.5 $\pm$ 320<br>16% |

<sup>1</sup> 10 replicates per experiment

<sup>2</sup> The control group (mice exposed to various types of hypoxia and not receiving RSV)

<sup>3</sup> 2 $\times$ 10<sup>-6</sup> mol/kg

**Table S4.** Protective activity of NAC-3-HP upon the stress exposure <sup>1</sup>

| <b>Impact</b>                                                      | <b>Measured parameters</b>       | <b>Control <sup>2</sup></b> | <b>NAC-3-HP <sup>3</sup></b> |
|--------------------------------------------------------------------|----------------------------------|-----------------------------|------------------------------|
| Injection of sodium azide 20 mg/kg<br>( <i>cytotoxic hypoxia</i> ) | Lifetime (min)<br>% of survivors | 3.3 ± 0.9<br>0%             | 5.2 ± 1.2<br>40%             |
| Injection of sodium nitrite 250 mg/kg ( <i>hemic hypoxia</i> )     | Lifetime (min)<br>% of survivors | 18.5 ± 2.1<br>0%            | 35.7 ± 4.4<br>15%            |
| Ethanol injection 8 g / kg ( <i>acute alcohol poisoning</i> )      | Lifetime (min)<br>% of survivors | 35.4 ± 6.1<br>0%            | 137.4 ± 31.1<br>12%          |

<sup>1</sup> 10 replicates per experiment<sup>2</sup> The control group(mice exposed to cytotoxic or hemic hypoxia, or acute alcohol poisoning and not receiving NAC-3-HP)<sup>3</sup> 10<sup>-6</sup> mol/kg
